# Supplementary material
Source: publisher site journal article supplement (https://www.dovepress.com/article/443711)
Supplement: Supplementary file 1 [file get_supplementary_file.php]

| Supplementary Table 1: The clinical characteristics of all 204 patients with 217 thyroid nodules. | | | | | | | | | | | | | | |
| --- | --- | --- | --- | --- | --- | --- | --- | --- | --- | --- | --- | --- | --- | --- |
| Number | Patients | *BRAF*V600E mutation | Frequency | Gender | Age | Drinking | Smoking | TBSRTC | C-TIRADS | Location | Multiplicity | Size  (mm) | Surgery | Pathological diagnosis |
| 1 | Patient1 | Positive | 5.79% | Female | 40 | No | No | V | 4b | Right | Multiple | 2.8 | Thermal ablation | - |
| 2 | Patient2 | Negative | - | Female | 41 | No | No | II | 4a | Right | Multiple | 13 | - | - |
| 3 | Patient3 | Negative | - | Male | 46 | Yes | Yes | II | 4a | Right | Multiple | 6 | - | - |
| 4 | Patient4 | Negative | - | Female | 34 | No | No | II | 4a | Left | Single | 15 | - | - |
| 5 | Patient5 | Positive | 22.93% | Male | 45 | Yes | Yes | III | 4b | Right | Single | 6.4 | Thyroidectomy | PTC |
| 6 | Patient6 | Positive | 16.46% | Female | 52 | No | No | III | 4a | Right | Multiple | 7 | - | - |
| 7 | Patient7 | Positive | 36.04% | Female | 33 | No | No | VI | 4c | Left | Multiple | 13 | Thyroidectomy | PTC |
| 8 | Patient7 | Positive | 36.04% | Female | 33 | No | No | VI | 4c | Right | Multiple | 17 | Thyroidectomy | PTC |
| 9 | Patient8 | Negative | - | Male | 48 | No | No | III | 4a | Right | Multiple | 15 | - | - |
| 10 | Patient9 | Negative | - | Male | 63 | No | Yes | VI | 4b | Right | Multiple | 18 | - | - |
| 11 | Patient10 | Negative | - | Female | 48 | No | No | II | 4a | Left | Single | 7 | - | - |
| 12 | Patient11 | Negative | - | Female | 38 | No | No | IV | 3 | Isthmus | Multiple | 33 | - | - |
| 13 | Patient12 | Negative | - | Female | 38 | No | No | II | 4a | Left | Single | 10 | - | - |
| 14 | Patient13 | Negative | - | Male | 44 | No | No | II | 4a | Left | Single | 9 | - | - |
| 15 | Patient14 | Negative | - | Male | 37 | No | No | II | 4a | Right | Single | 6 | - | - |
| 16 | Patient15 | Negative | - | Male | 35 | Yes | Yes | V | 4b | Left | Multiple | 5 | Thyroidectomy | PTC |
| 17 | Patient15 | Negative | - | Male | 35 | Yes | Yes | IV | 4b | Right | Multiple | 14 | Thyroidectomy | PTC |
| 18 | Patient16 | Negative | - | Female | 33 | No | No | V | 4a | Left | Multiple | 2.3 | - | - |
| 19 | Patient17 | Negative | - | Female | 52 | No | No | II | 4a | Right | Single | 11 | - | - |
| 20 | Patient18 | Positive | 4.07% | Female | 55 | No | No | III | 4b | Right | Multiple | 19 | - | - |
| 21 | Patient19 | Negative | - | Female | 42 | No | No | III | 3 | Right | Multiple | 9 | - | - |
| 22 | Patient20 | Negative | - | Female | 47 | No | No | III | 4a | Left | Multiple | 12 | Thyroidectomy | Nodular goiter |
| 23 | Patient21 | Negative | - | Female | 38 | No | No | III | 3 | Left | Multiple | 30 | Thyroidectomy | Nodular goiter |
| 24 | Patient22 | Negative | - | Female | 35 | No | No | II | 4a | Left | Multiple | 7 | - | - |
| 25 | Patient23 | Negative | - | Male | 56 | No | No | II | 4a | Left | Multiple | 17 | - | - |
| 26 | Patient24 | Positive | 6.66% | Female | 56 | No | No | III | 4b | Left | Multiple | 5 | Thermal ablation | - |
| 27 | Patient24 | Positive | 6.66% | Female | 56 | No | No | III | 4b | Right | Multiple | 5.7 | Thermal ablation | - |
| 28 | Patient25 | Positive | 22.87% | Female | 32 | No | No | V | 4a | Right | Single | 6 | - | - |
| 29 | Patient26 | Positive | 46.97% | Female | 39 | No | No | III | 4a | Right | Multiple | 10 | - | - |
| 30 | Patient27 | Negative | - | Female | 57 | No | No | II | 4a | Left | Multiple | 12 | - | - |
| 31 | Patient28 | Negative | - | Female | 28 | No | No | III | 4a | Left | Single | 24 | - | - |
| 32 | Patient29 | Positive | 0.61% | Female | 54 | No | No | V | 4b | Left | Single | 6.8 | - | - |
| 33 | Patient30 | Negative | - | Male | 66 | No | No | II | 4a | Right | Multiple | 6 | - | - |
| 34 | Patient31 | Positive | 0.12% | Female | 72 | No | No | II | 4a | Right | Multiple | 7 | - | - |
| 35 | Patient31 | Positive | 0.12% | Female | 72 | No | No | II | 4a | Left | Multiple | 17 | - | - |
| 36 | Patient32 | Negative | - | Male | 61 | No | No | III | 4a | Left | Multiple | 10 | - | - |
| 37 | Patient33 | Negative | - | Male | 48 | No | No | II | 4a | Right | Multiple | 5.3 | - | - |
| 38 | Patient34 | Negative | - | Female | 69 | No | No | V | 4b | Right | Multiple | 5 | - | - |
| 39 | Patient35 | Positive | 0.53% | Female | 27 | No | No | V | 4a | Right | Single | 6 | - | - |
| 40 | Patient36 | Positive | 8.45% | Male | 42 | Yes | No | V | 4a | Right | Single | 4 | Thyroidectomy | PTC |
| 41 | Patient37 | Negative | - | Female | 43 | No | No | II | 4a | Left | Multiple | 16 | - | - |
| 42 | Patient37 | Negative | - | Female | 43 | No | No | II | 4a | Right | Multiple | 8 | - | - |
| 43 | Patient38 | Negative | - | Male | 32 | No | No | II | 4a | Right | Single | 14 | - | - |
| 44 | Patient39 | Negative | - | Female | 38 | No | No | II | 4a | Right | Single | 3.7 | - | - |
| 45 | Patient40 | Negative | - | Male | 46 | No | No | II | 4a | Right | Multiple | 6 | - | - |
| 46 | Patient41 | Negative | - | Female | 39 | No | No | II | 4a | Left | Multiple | 5 | - | - |
| 47 | Patient42 | Negative | - | Female | 38 | No | No | II | 4a | Left | Single | 9 | - | - |
| 48 | Patient43 | Positive | 1.42% | Female | 29 | Yes | Yes | III | 4b | Left | Multiple | 12 | Thyroidectomy | PTC |
| 49 | Patient44 | Negative | - | Female | 55 | No | No | II | 4a | Left | Single | 16 | - | - |
| 50 | Patient45 | Negative | - | Female | 28 | No | No | II | 4a | Right | Single | 13 | - | - |
| 51 | Patient46 | Negative | - | Female | 55 | No | No | II | 4a | Left | Single | 9 | - | - |
| 52 | Patient47 | Negative | - | Female | 51 | No | No | II | 4a | Right | Multiple | 8.5 | - | - |
| 53 | Patient48 | Negative | - | Female | 46 | No | No | II | 4a | Left | Multiple | 4 | - | - |
| 54 | Patient49 | Negative | - | Male | 54 | No | No | III | 4a | Left | Single | 10 | - | - |
| 55 | Patient50 | Negative | - | Male | 66 | No | No | II | 4a | Right | Single | 10 | Thermal ablation | - |
| 56 | Patient51 | Negative | - | Female | 58 | No | No | II | 3 | Left | Single | 12 | - | - |
| 57 | Patient52 | Negative | - | Female | 37 | No | No | II | 4a | Left | Single | 10 | - | - |
| 58 | Patient53 | Positive | 20.24% | Female | 38 | No | No | V | 4c | Right | Multiple | 12 | Thyroidectomy | PTC |
| 59 | Patient54 | Negative | - | Female | 35 | No | No | II | 4a | Left | Single | 8 | - | - |
| 60 | Patient55 | Positive | 0.79% | Female | 39 | No | No | V | 4c | Left | Multiple | 9.1 | Thyroidectomy | PTC |
| 61 | Patient56 | Positive | 14.63% | Female | 39 | No | No | III | 4a | Right | Single | 10 | - | - |
| 62 | Patient57 | Positive | 0.49% | Female | 39 | No | No | V | 4a | Left | Single | 8 | - | - |
| 63 | Patient58 | Negative | - | Female | 33 | No | No | II | 4a | Right | Single | 5 | - | - |
| 64 | Patient59 | Negative | - | Male | 56 | No | No | V | 4b | Right | Single | 4.4 | Thermal ablation | - |
| 65 | Patient60 | Negative | - | Female | 58 | No | No | III | 4a | Right | Multiple | 13 | - | - |
| 66 | Patient61 | Negative | - | Female | 48 | No | No | II | 4a | Left | Single | 2.7 | - | - |
| 67 | Patient62 | Positive | 28.90% | Female | 49 | No | No | V | 4a | Isthmus | Multiple | 11 | - | - |
| 68 | Patient63 | Positive | 21.95% | Male | 46 | No | Yes | V | 4a | Left | Multiple | 5.8 | Thyroidectomy | PTC |
| 69 | Patient64 | Negative | - | Female | 41 | No | No | II | 4a | Left | Single | 8 | - | - |
| 70 | Patient65 | Positive | 2.53% | Female | 38 | No | No | III | 4a | Left | Multiple | 10 | - | - |
| 71 | Patient66 | Negative | - | Female | 55 | No | No | II | 4a | Left | Multiple | 24 | - | - |
| 72 | Patient67 | Positive | 20.68% | Male | 57 | No | No | V | 4c | Left | Multiple | 14.8 | - | - |
| 73 | Patient68 | Negative | - | Female | 56 | No | No | II | 4a | Left | Multiple | 38 | Thyroidectomy | PTC |
| 74 | Patient69 | Negative | - | Female | 35 | No | No | II | 4a | Left | Single | 2.6 | - | - |
| 75 | Patient70 | Positive | 1.55% | Female | 62 | No | No | II | 4a | Right | Single | 2.4 | - | - |
| 76 | Patient71 | Positive | 0.21% | Female | 62 | No | No | III | 4a | Right | Single | 10 | - | - |
| 77 | Patient72 | Negative | - | Female | 42 | No | No | II | 4a | Left | Multiple | 5 | - | - |
| 78 | Patient73 | Positive | 4.09% | Male | 49 | No | No | II | 4b | Left | Multiple | 10 | - | - |
| 79 | Patient73 | Positive | 4.09% | Male | 49 | No | No | III | 4b | Isthmus | Multiple | 3.2 | - | - |
| 80 | Patient74 | Negative | - | Female | 45 | No | No | II | 4a | Left | Multiple | 5 | Thermal ablation | - |
| 81 | Patient74 | Negative | - | Female | 45 | No | No | II | 4b | Right | Multiple | 7 | Thermal ablation | - |
| 82 | Patient75 | Positive | 11.15% | Female | 58 | No | No | V | 4b | Left | Multiple | 10 | - | - |
| 83 | Patient76 | Positive | 25.51% | Female | 29 | No | No | III | 4a | Left | Single | 7 | - | - |
| 84 | Patient77 | Negative | - | Female | 64 | No | No | II | 3 | Left | Single | 7 | - | - |
| 85 | Patient78 | Negative | - | Female | 38 | No | No | II | 4a | Right | Multiple | 6 | - | - |
| 86 | Patient79 | Negative | - | Female | 47 | No | No | II | 4a | Right | Single | 13 | - | - |
| 87 | Patient80 | Negative | - | Female | 30 | No | No | II | 4a | Right | Multiple | 42 | - | - |
| 88 | Patient81 | Negative | - | Female | 45 | No | No | II | 4a | Right | Single | 8 | - | - |
| 89 | Patient82 | Positive | 8.52% | Male | 43 | No | No | V | 4b | Right | Multiple | 6 | - | - |
| 90 | Patient83 | Negative | - | Female | 47 | No | No | II | 3 | Left | Single | 15 | - | - |
| 91 | Patient84 | Positive | 28.63% | Female | 53 | No | No | V | 4a | Left | Multiple | 8 | - | - |
| 92 | Patient85 | Negative | - | Female | 62 | No | No | II | 4c | Right | Multiple | 12 | - | - |
| 93 | Patient86 | Positive | 35.35% | Female | 40 | No | No | V | 4a | Right | Single | 8 | - | - |
| 94 | Patient87 | Positive | 3.59% | Female | 41 | No | No | V | 4a | Left | Single | 3.7 | Thyroidectomy | PTC |
| 95 | Patient88 | Positive | 9.87% | Female | 50 | No | No | III | 4a | Right | Multiple | 21 | Thyroidectomy | PTC |
| 96 | Patient89 | Negative | 0.07% | Female | 53 | No | No | II | 4a | Right | Multiple | 6 | - | - |
| 97 | Patient90 | Positive | 12.73% | Female | 65 | No | No | II | 4a | Right | Single | 4.8 | - | - |
| 98 | Patient91 | Negative | - | Female | 51 | No | No | V | 4a | Right | Single | 8 | - | - |
| 99 | Patient92 | Negative | - | Female | 34 | No | No | II | 4a | Right | Multiple | 2.4 | - | - |
| 100 | Patient93 | Positive | 3.56% | Female | 48 | No | No | II | 4a | Right | Multiple | 14 | Thermal ablation | - |
| 101 | Patient94 | Negative | - | Female | 60 | No | No | II | 4a | Left | Single | 12 | - | - |
| 102 | Patient95 | Positive | 6.47% | Female | 49 | No | No | V | 4b | Right | Single | 20 | Thyroidectomy | PTC |
| 103 | Patient96 | Positive | 23.31% | Female | 50 | No | No | III | 4a | Right | Single | 7 | - | - |
| 104 | Patient97 | Positive | 18.60% | Female | 62 | No | No | III | 4a | Right | Single | 13 | - | - |
| 105 | Patient98 | Positive | 12.24% | Female | 37 | No | No | V | 4b | Right | Single | 20 | Thyroidectomy | PTC |
| 106 | Patient99 | Negative | - | Female | 74 | No | No | V | 4b | Left | Multiple | 15 | Thyroidectomy | MTC |
| 107 | Patient100 | Positive | 2.55% | Female | 40 | No | No | II | 4a | Right | Multiple | 15 | - | - |
| 108 | Patient101 | Positive | 22.06% | Male | 64 | No | No | V | 4b | Left | Multiple | 9.1 | Thyroidectomy | PTC |
| 109 | Patient101 | Positive | 22.06% | Male | 64 | No | No | II | 4a | Right | Multiple | 26.4 | Thyroidectomy | - |
| 110 | Patient102 | Negative | - | Female | 39 | No | No | II | 4a | Left | Single | 3.2 | - | - |
| 111 | Patient103 | Negative | - | Female | 51 | No | No | II | 4a | Left | Multiple | 6 | - | - |
| 112 | Patient104 | Negative | - | Female | 50 | No | No | II | 4a | Left | Multiple | 2.2 | - | - |
| 113 | Patient105 | Positive | 1.77% | Female | 61 | No | No | II | 4a | Left | Multiple | 3 | - | - |
| 114 | Patient106 | Positive | 0.12% | Male | 37 | No | No | III | 4b | Left | Multiple | 7 | Thyroidectomy | PTC |
| 115 | Patient107 | Negative | - | Female | 52 | No | No | II | 4b | Right | Multiple | 7 | Thyroidectomy | PTC |
| 116 | Patient108 | Negative | - | Female | 47 | No | No | II | 4a | Left | Multiple | 16 | - | - |
| 117 | Patient108 | Negative | - | Female | 47 | No | No | II | 4a | Right | Multiple | 22 | - | - |
| 118 | Patient109 | Positive | 19.32% | Male | 37 | No | No | VI | 4b | Right | Single | 13 | Thyroidectomy | PTC |
| 119 | Patient110 | Positive | 1.90% | Male | 47 | No | No | III | 4a | Left | Multiple | 4.1 | - | - |
| 120 | Patient111 | Negative | - | Female | 50 | No | No | II | 4a | Left | Single | 6 | - | - |
| 121 | Patient112 | Negative | - | Female | 31 | No | No | V | 4a | Right | Multiple | 7 | - | - |
| 122 | Patient113 | Positive | 0.22% | Male | 42 | No | No | V | 4a | Right | Single | 12 | Thyroidectomy | PTC |
| 123 | Patient114 | Negative | - | Male | 50 | No | No | II | 4a | Left | Single | 2.7 | - | - |
| 124 | Patient115 | Negative | - | Female | 55 | No | No | III | 4a | Right | Single | 6 | - | - |
| 125 | Patient116 | Positive | 17.34% | Female | 31 | No | No | V | 4a | Right | Single | 5.5 | Thyroidectomy | PTC |
| 126 | Patient117 | Positive | 13.80% | Female | 24 | No | No | III | 4a | Left | Multiple | 3.4 | Thyroidectomy | PTC |
| 127 | Patient117 | Positive | 13.80% | Female | 24 | No | No | V | 4a | Right | Multiple | 6.3 | Thyroidectomy | PTC |
| 128 | Patient118 | Negative | - | Female | 28 | No | No | III | 4a | Right | Single | 8 | - | - |
| 129 | Patient119 | Negative | - | Female | 53 | No | No | II | 4b | Right | Multiple | 12 | Thyroidectomy | Nodular goiter |
| 130 | Patient120 | Positive | 33.88% | Female | 34 | No | No | V | 4a | Left | Single | 10 | - | - |
| 131 | Patient121 | Positive | 3.07% | Male | 30 | No | No | V | 4b | Right | Single | 8.1 | - | - |
| 132 | Patient122 | Positive | 5.42% | Female | 47 | No | No | V | 4a | Left | Multiple | 3.9 | Thyroidectomy | PTC |
| 133 | Patient123 | Positive | 6.67% | Female | 48 | No | No | II | 4a | Left | Multiple | 11 | Thyroidectomy | PTC |
| 134 | Patient124 | Negative | - | Female | 66 | No | No | II | 4a | Left | Single | 10 | - | - |
| 135 | Patient125 | Negative | - | Female | 52 | No | No | II | 4a | Left | Multiple | 13.6 | - | - |
| 136 | Patient126 | Positive | 0.50% | Female | 64 | No | No | II | 4a | Right | Multiple | 4.4 | thyroidectomy | PTC |
| 137 | Patient127 | Negative | - | Female | 50 | No | No | II | 4a | Right | Multiple | 6 | - | - |
| 138 | Patient128 | Negative | - | Male | 47 | No | No | II | 4a | Left | Multiple | 22 | - | - |
| 139 | Patient129 | Negative | - | Male | 46 | No | No | II | 4a | Left | Multiple | 6 | Thyroidectomy | PTC |
| 140 | Patient129 | Negative | - | Male | 46 | No | No | II | 4a | Right | Multiple | 6 | Thyroidectomy | PTC |
| 141 | Patient130 | Negative | - | Female | 36 | No | No | III | 4b | Right | Multiple | 4.1 | - | - |
| 142 | Patient131 | Negative | - | Female | 53 | No | No | II | 4a | Left | Multiple | 6 | - | - |
| 143 | Patient132 | Negative | - | Male | 45 | Yes | Yes | II | 4a | Left | Single | 7 | - | - |
| 144 | Patient133 | Positive | 1.77% | Female | 31 | No | No | V | 4a | Right | Single | 3.8 | - | - |
| 145 | Patient134 | Positive | 6.06% | Female | 36 | No | No | V | 4a | Right | Single | 3.9 | - | - |
| 146 | Patient135 | Positive | 4.93% | Female | 56 | No | No | II | 4b | Left | Single | 12 | - | - |
| 147 | Patient136 | Positive | 2.44% | Female | 65 | No | No | II | 4a | Left | Multiple | 21 | - | - |
| 148 | Patient137 | Negative | - | Female | 34 | No | No | II | 4a | Left | Single | 7 | - | - |
| 149 | Patient138 | Negative | - | Female | 91 | No | No | V | 4a | Left | Multiple | 19 | - | - |
| 150 | Patient139 | Negative | - | Female | 34 | No | No | II | 4a | Left | Multiple | 6 | - | - |
| 151 | Patient140 | Positive | 21.58% | Female | 61 | No | No | V | 4b | Right | Multiple | 7 | - | - |
| 152 | Patient141 | Positive | 0.15% | Female | 32 | No | No | III | 4a | Left | Multiple | 4.9 | - | - |
| 153 | Patient142 | Positive | 11.89% | Female | 46 | No | No | V | 4b | Left | Multiple | 4 | - | - |
| 154 | Patient143 | Positive | 21.34% | Female | 29 | No | No | III | 4a | Left | Single | 3.1 | - | - |
| 155 | Patient144 | Negative | - | Male | 46 | No | Yes | II | 4a | Left | Single | 7.1 | - | - |
| 156 | Patient145 | Negative | - | Female | 54 | No | No | II | 4a | Right | Multiple | 16 | - | - |
| 157 | Patient146 | Negative | - | Female | 59 | No | No | II | 4a | Left | Single | 14 | - | - |
| 158 | Patient147 | Negative | - | Male | 36 | No | No | II | 4a | Left | Single | 7 | - | - |
| 159 | Patient148 | Negative | - | Female | 57 | No | No | III | 4a | Right | Multiple | 15 | Thyroidectomy | Thyroiditis |
| 160 | Patient149 | Positive | 9.60% | Female | 50 | No | No | V | 4b | Left | Single | 7 | - | - |
| 161 | Patient150 | Negative | - | Female | 51 | No | No | II | 4a | Left | Single | 8 | - | - |
| 162 | Patient151 | Negative | - | Male | 43 | No | No | III | 4b | Left | Multiple | 5.5 | - | - |
| 163 | Patient152 | Positive | 9.87% | Female | 69 | No | No | V | 4b | Right | Multiple | 5、3 | - | - |
| 164 | Patient153 | Positive | 26.77% | Female | 52 | No | No | V | 4b | Left | Multiple | 12 | Thyroidectomy | PTC |
| 165 | Patient154 | Positive | 1.14% | Female | 58 | No | No | II | 4a | Right | Multiple | 7 | Thyroidectomy | PTC |
| 166 | Patient155 | Negative | - | Female | 55 | No | No | III | 4a | Right | Multiple | 10 | - | - |
| 167 | Patient156 | Positive | 15.74% | Male | 31 | No | No | V | 4b | Left | Single | 9 | - | - |
| 168 | Patient157 | Negative | - | Male | 63 | No | No | II | 4a | Left | Single | 7 | - | - |
| 169 | Patient158 | Positive | 0.16% | Female | 37 | No | No | III | 4a | Right | Single | 12 | - | - |
| 170 | Patient159 | Positive | 9.75% | Male | 59 | No | No | III | 4a | Right | Multiple | 4 | Thyroidectomy | PTC |
| 171 | Patient160 | Negative | - | Female | 45 | No | No | III | 4a | Left | Multiple | 4 | - | - |
| 172 | Patient161 | Negative | - | Female | 43 | No | No | II | 4a | Left | Single | 7 | - | - |
| 173 | Patient162 | Negative | - | Female | 32 | No | No | V | 4a | Right | Multiple | 3 | - | - |
| 174 | Patient163 | Positive | 5.18% | Female | 48 | No | No | V | 4a | Right | Single | 7.3 | - | - |
| 175 | Patient164 | Negative | - | Female | 63 | No | No | V | 4a | Right | Multiple | 13 | Thermal ablation | - |
| 176 | Patient165 | Negative | - | Female | 51 | No | No | II | 4a | Right | Single | 8 | - | - |
| 177 | Patient166 | Negative | - | Female | 72 | No | Yes | III | 4c | Left | Multiple | 8.8 | Thyroidectomy | PTC |
| 178 | Patient166 | Negative | - | Female | 72 | No | Yes | V | 4c | Right | Multiple | 6 | Thyroidectomy | PTC |
| 179 | Patient167 | Negative | - | Female | 64 | No | No | II | 4a | Left | Single | 13 | - | - |
| 180 | Patient168 | Positive | 20.68% | Female | 33 | No | No | V | 4b | Right | Multiple | 4 | - | - |
| 181 | Patient169 | Positive | 0.81% | Male | 28 | No | No | II | 4a | Left | Multiple | 1.8 | - | - |
| 182 | Patient170 | Positive | 18.39% | Male | 71 | No | Yes | III | 4a | Right | Multiple | 13 | - | - |
| 183 | Patient171 | Positive | 27.37% | Female | 28 | No | No | III | 4a | Right | Single | 7 | - | - |
| 184 | Patient172 | Negative | - | Female | 67 | No | No | II | 4a | Right | Multiple | 8 | - | - |
| 185 | Patient172 | Negative | - | Female | 67 | No | No | II | 4a | Left | Multiple | 8 | - | - |
| 186 | Patient173 | Positive | 24.36% | Female | 40 | No | No | III | 4b | Right | Multiple | 10 | Thyroidectomy | PTC |
| 187 | Patient174 | Negative | - | Male | 57 | No | Yes | II | 4a | Left | Multiple | 4.3 | - | - |
| 188 | Patient175 | Positive | 0.36% | Male | 37 | No | No | V | 4b | Right | Single | 8 | - | - |
| 189 | Patient176 | Negative | - | Female | 50 | No | No | III | 4a | Left | Multiple | 7 | - | - |
| 190 | Patient177 | Negative | - | Male | 58 | Yes | Yes | V | 4a | Right | Single | 4.8 | - | - |
| 191 | Patient178 | Negative | - | Female | 23 | No | No | V | 4a | Right | Single | 4.7 | - | - |
| 192 | Patient179 | Negative | - | Male | 45 | No | No | V | 4a | Right | Multiple | 6 | - | - |
| 193 | Patient180 | Positive | 3.42% | Female | 18 | No | No | III | 4a | Left | Multiple | 4.5 | Thermal ablation | - |
| 194 | Patient181 | Negative | - | Female | 48 | No | No | V | 4a | Right | Multiple | 3.4 | - | - |
| 195 | Patient182 | Negative | - | Male | 46 | No | Yes | II | 4a | Right | Single | 8 | - | - |
| 196 | Patient183 | Negative | - | Female | 17 | No | No | III | 4a | Left | Single | 5 | - | - |
| 197 | Patient184 | Negative | - | Male | 56 | No | Yes | II | 4b | Left | Single | 10 | - | - |
| 198 | Patient185 | Positive | 14.03% | Female | 45 | No | No | III | 4a | Right | Single | 7 | - | - |
| 199 | Patient186 | Positive | 4.84% | Female | 62 | No | No | II | 4a | Right | Multiple | 6.3 | - | - |
| 200 | Patient187 | Positive | 2.59% | Female | 59 | No | No | V | 4b | Right | Multiple | 13 | - | - |
| 201 | Patient188 | Negative | - | Male | 48 | Yes | No | II | 4a | Right | Multiple | 13 | - | - |
| 202 | Patient189 | Positive | 0.21% | Female | 59 | No | No | III | 4b | Left | Multiple | 20 | Thyroidectomy | PTC |
| 203 | Patient190 | Positive | 28.02% | Female | 40 | No | No | III | 4b | Left | Single | 6 | - | - |
| 204 | Patient191 | Negative | - | Female | 60 | No | No | V | 4b | Right | Single | 10 | - | - |
| 205 | Patient192 | Negative | - | Male | 48 | No | Yes | II | 4a | Left | Multiple | 9 | - | - |
| 206 | Patient193 | Negative | - | Female | 50 | No | No | II | 4b | Left | Multiple | 5 | - | - |
| 207 | Patient194 | Positive | 12.70% | Male | 46 | No | No | III | 4a | Left | Single | 4 | Thyroidectomy | PTC |
| 208 | Patient195 | Negative | - | Female | 38 | No | No | III | 4a | Left | Single | 9 | - | - |
| 209 | Patient196 | Negative | - | Female | 39 | No | No | III | 4b | Right | Multiple | 4.9 | - | - |
| 210 | Patient197 | Negative | - | Female | 41 | No | No | II | 4a | Right | Multiple | 21 | - | - |
| 211 | Patient198 | Positive | 10.90% | Male | 44 | Yes | Yes | II | 4a | Right | Single | 8 | - | - |
| 212 | Patient199 | Negative | - | Female | 73 | No | No | III | 4a | Left | Multiple | 22 | - | - |
| 213 | Patient200 | Negative | - | Male | 53 | No | Yes | III | 4a | Left | Single | 6.5 | - | - |
| 214 | Patient201 | Negative | - | Female | 44 | No | No | V | 4a | Left | Multiple | 5 | Thyroidectomy | PTC |
| 215 | Patient202 | Positive | 11.86% | Male | 45 | Yes | Yes | III | 4b | Left | Single | 4 | Thyroidectomy | PTC |
| 216 | Patient203 | Negative | - | Female | 49 | No | No | II | 4a | Right | Multiple | 5 | - | - |
| 217 | Patient204 | Positive | 0.60% | Male | 57 | No | Yes | V | 4b | Left | Single | 7 | - | - |
| Abbreviations: TBSRTC, the Bethesda System for Reporting Thyroid Cytopathology; C-TIRADS, Chinese thyroid imaging reporting and data system; PTC, papillary thyroid cancer; MTC, medullary thyroid cancer. | | | | | | | | | | | | | | |

Supplementary Table 2: The clinical and ultrasound features of patients in TBSRTC II.

| Number | Patients | *BRAF*V600E mutation | Frequency | Gender | Age | Drink-ing | Smok-ing | TBSRTC | C-TIRADS | Location | Multiplicity | Morphology | Internal echo | Boundary | Size  (mm) | Surgery | Pathological diagnosis |
| --- | --- | --- | --- | --- | --- | --- | --- | --- | --- | --- | --- | --- | --- | --- | --- | --- | --- |
| 1 | Patient2 | Negative | - | Female | 41 | No | No | II | 4a | Right | Multiple | Regular | Hypoecho | Clear | 13 | - | - |
| 2 | Patient3 | Negative | - | Male | 46 | Yes | Yes | II | 4a | Right | Multiple | Irregular | Hypoecho | Unclear | 6 | - | - |
| 3 | Patient4 | Negative | - | Female | 34 | No | No | II | 4a | Left | Single | Regular | Equal echo | Clear | 15 | - | - |
| 4 | Patient10 | Negative | - | Female | 48 | No | No | II | 4a | Left | Single | Irregular | Hypoecho | Unclear | 7 | - | - |
| 5 | Patient12 | Negative | - | Female | 38 | No | No | II | 4a | Left | Single | Irregular | Hypoecho | Unclear | 10 | - | - |
| 6 | Patient13 | Negative | - | Male | 44 | No | No | II | 4a | Left | Single | Regular | Hypoecho | Unclear | 9 | - | - |
| 7 | Patient14 | Negative | - | Male | 37 | No | No | II | 4a | Right | Single | Regular | Hypoecho | Unclear | 6 | - | - |
| 8 | Patient17 | Negative | - | Female | 52 | No | No | II | 4a | Right | Single | Irregular | Hypoecho | Unclear | 11 | - | - |
| 9 | Patient22 | Negative | - | Female | 35 | No | No | II | 4a | Left | Multiple | Regular | Hypoecho | Clear | 7 | - | - |
| 10 | Patient23 | Negative | - | Male | 56 | No | No | II | 4a | Left | Multiple | Regular | Hypoecho | Clear | 17 | - | - |
| 11 | Patient27 | Negative | - | Female | 57 | No | No | II | 4a | Left | Multiple | Irregular | Hypoecho | Unclear | 12 | - | - |
| 12 | Patient30 | Negative | - | Male | 66 | No | No | II | 4a | Right | Multiple | Regular | Mixed echo | Clear | 6 | - | - |
| 13 | Patient31 | Positive | 0.12% | Female | 72 | No | No | II | 4a | Right | Multiple | Irregular | Hypoecho | Clear | 7 | - | - |
| 14 | Patient31 | Positive | 0.12% | Female | 72 | No | No | II | 4a | Left | Multiple | Irregular | Hypoecho | Clear | 17 | - | - |
| 15 | Patient33 | Negative | - | Male | 48 | No | No | II | 4a | Right | Multiple | Regular | Hypoecho | Clear | 5.3 | - | - |
| 16 | Patient37 | Negative | - | Female | 43 | No | No | II | 4a | Left | Multiple | Regular | Equal echo | Clear | 16 | - | - |
| 17 | Patient37 | Negative | - | Female | 43 | No | No | II | 4a | Right | Multiple | Regular | Equal echo | Clear | 8 | - | - |
| 18 | Patient38 | Negative | - | Male | 32 | No | No | II | 4a | Right | Single | Regular | Hypoecho | Clear | 14 | - | - |
| 19 | Patient39 | Negative | - | Female | 38 | No | No | II | 4a | Right | Single | Irregular | Hypoecho | Unclear | 3.7 | - | - |
| 20 | Patient40 | Negative | - | Male | 46 | No | No | II | 4a | Right | Multiple | Irregular | Hypoecho | Clear | 6 | - | - |
| 21 | Patient41 | Negative | - | Female | 39 | No | No | II | 4a | Left | Multiple | Regular | Hypoecho | Clear | 5 | - | - |
| 22 | Patient42 | Negative | - | Female | 38 | No | No | II | 4a | Left | Single | Irregular | Hypoecho | Unclear | 9 | - | - |
| 23 | Patient44 | Negative | - | Female | 55 | No | No | II | 4a | Left | Single | Regular | Hypoecho | Clear | 16 | - | - |
| 24 | Patient45 | Negative | - | Female | 28 | No | No | II | 4a | Right | Single | Irregular | Hypoecho | Unclear | 13 | - | - |
| 25 | Patient46 | Negative | - | Female | 55 | No | No | II | 4a | Left | Single | Irregular | Hypoecho | Unclear | 9 | - | - |
| 26 | Patient47 | Negative | - | Female | 51 | No | No | II | 4a | Right | Multiple | Irregular | Hypoecho | Unclear | 8.5 | - | - |
| 27 | Patient48 | Negative | - | Female | 46 | No | No | II | 4a | Left | Multiple | Irregular | Hypoecho | Unclear | 4 | - | - |
| 28 | Patient50 | Negative | - | Male | 66 | No | No | II | 4a | Right | Single | Irregular | Hypoecho | Unclear | 10 | Thermal ablation | - |
| 29 | Patient51 | Negative | - | Female | 58 | No | No | II | 3 | Left | Single | Regular | Hyperecho | Clear | 12 | - | - |
| 30 | Patient52 | Negative | - | Female | 37 | No | No | II | 4a | Left | Single | Irregular | Hypoecho | Unclear | 10 | - | - |
| 31 | Patient54 | Negative | - | Female | 35 | No | No | II | 4a | Left | Single | Irregular | Hypoecho | Unclear | 8 | - | - |
| 32 | Patient58 | Negative | - | Female | 33 | No | No | II | 4a | Right | Single | Regular | Hyperecho | Clear | 5 | - | - |
| 33 | Patient61 | Negative | - | Female | 48 | No | No | II | 4a | Left | Single | Irregular | Hypoecho | Unclear | 2.7 | - | - |
| 34 | Patient64 | Negative | - | Female | 41 | No | No | II | 4a | Left | Single | Irregular | Hypoecho | Clear | 8 | - | - |
| 35 | Patient66 | Negative | - | Female | 55 | No | No | II | 4a | Left | Multiple | Regular | Hypoecho | Clear | 24 | - | - |
| 36 | Patient68 | Negative | - | Female | 56 | No | No | II | 4a | Left | Multiple | Irregular | Hypoecho | Unclear | 38 | Thyroidectomy | PTC |
| 37 | Patient69 | Negative | - | Female | 35 | No | No | II | 4a | Left | Single | Regular | Hypoecho | Clear | 2.6 | - | - |
| 38 | Patient70 | Positive | 1.55% | Female | 62 | No | No | II | 4a | Right | Single | Irregular | Hypoecho | Unclear | 2.4 | - | - |
| 39 | Patient72 | Negative | - | Female | 42 | No | No | II | 4a | Left | Multiple | Regular | Hypoecho | Clear | 5 | - | - |
| 40 | Patient73 | Positive | 4.09% | Male | 49 | No | No | II | 4b | Left | Multiple | Irregular | Hypoecho | Unclear | 10 | - | - |
| 41 | Patient74 | Negative | - | Female | 45 | No | No | II | 4a | Left | Multiple | Irregular | Hypoecho | Unclear | 5 | Thermal ablation | - |
| 42 | Patient74 | Negative | - | Female | 45 | No | No | II | 4b | Right | Multiple | Irregular | Hypoecho | Unclear | 7 | Thermal ablation | - |
| 43 | Patient77 | Negative | - | Female | 64 | No | No | II | 3 | Left | Single | Regular | Hypoecho | Unclear | 7 | - | - |
| 44 | Patient78 | Negative | - | Female | 38 | No | No | II | 4a | Right | Multiple | Regular | Hypoecho | Clear | 6 | - | - |
| 45 | Patient79 | Negative | - | Female | 47 | No | No | II | 4a | Right | Single | Regular | Hypoecho | Unclear | 13 | - | - |
| 46 | Patient80 | Negative | - | Female | 30 | No | No | II | 4a | Right | Multiple | Regular | Hypoecho | Clear | 42 | - | - |
| 47 | Patient81 | Negative | - | Female | 45 | No | No | II | 4a | Right | Single | Irregular | Hypoecho | Unclear | 8 | - | - |
| 48 | Patient83 | Negative | - | Female | 47 | No | No | II | 3 | Left | Single | Irregular | Hypoecho | Unclear | 15 | - | - |
| 49 | Patient85 | Negative | - | Female | 62 | No | No | II | 4c | Right | Multiple | Irregular | Hypoecho | Unclear | 12 | - | - |
| 50 | Patient89 | Negative | 0.07% | Female | 53 | No | No | II | 4a | Right | Multiple | Irregular | Hypoecho | Unclear | 6 | - | - |
| 51 | Patient90 | Positive | 12.73% | Female | 65 | No | No | II | 4a | Right | Single | Irregular | Hypoecho | Unclear | 4.8 | - | - |
| 52 | Patient92 | Negative | - | Female | 34 | No | No | II | 4a | Right | Multiple | Irregular | Hypoecho | Clear | 2.4 | - | - |
| 53 | Patient93 | Positive | 3.56% | Female | 48 | No | No | II | 4a | Right | Multiple | Irregular | Hypoecho | Unclear | 14 | Thermal ablation | - |
| 54 | Patient94 | Negative | - | Female | 60 | No | No | II | 4a | Left | Single | Irregular | Hypoecho | Unclear | 12 | - | - |
| 55 | Patient100 | Positive | 2.55% | Female | 40 | No | No | II | 4a | Right | Multiple | Regular | Mixed echo | Clear | 15 | - | - |
| 56 | Patient101 | Positive | 22.06% | Male | 64 | No | No | II | 4a | Right | Multiple | Regular | Hypoecho | Clear | 26.4 | Thyroidectomy | - |
| 57 | Patient102 | Negative | - | Female | 39 | No | No | II | 4a | Left | Single | Regular | Hypoecho | Clear | 3.2 | - | - |
| 58 | Patient103 | Negative | - | Female | 51 | No | No | II | 4a | Left | Multiple | Irregular | Hypoecho | Unclear | 6 | - | - |
| 59 | Patient104 | Negative | - | Female | 50 | No | No | II | 4a | Left | Multiple | Irregular | Hypoecho | Unclear | 2.2 | - | - |
| 60 | Patient105 | Positive | 1.77% | Female | 61 | No | No | II | 4a | Left | Multiple | Irregular | Hypoecho | Unclear | 3 | - | - |
| 61 | Patient107 | Negative | - | Female | 52 | No | No | II | 4b | Right | Multiple | Irregular | Hypoecho | Unclear | 7 | Thyroidectomy | PTC |
| 62 | Patient108 | Negative | - | Female | 47 | No | No | II | 4a | Left | Multiple | Irregular | Hypoecho | Unclear | 16 | - | - |
| 63 | Patient108 | Negative | - | Female | 47 | No | No | II | 4a | Right | Multiple | Irregular | Hypoecho | Unclear | 22 | - | - |
| 64 | Patient111 | Negative | - | Female | 50 | No | No | II | 4a | Left | Single | Irregular | Hypoecho | Unclear | 6 | - | - |
| 65 | Patient114 | Negative | - | Male | 50 | No | No | II | 4a | Left | Single | Irregular | Hypoecho | Clear | 2.7 | - | - |
| 66 | Patient119 | Negative | - | Female | 53 | No | No | II | 4b | Right | Multiple | Regular | Hypoecho | Clear | 12 | Thyroidectomy | Nodular goiter |
| 67 | Patient123 | Positive | 6.67% | Female | 48 | No | No | II | 4a | Left | Multiple | Irregular | Hypoecho | Unclear | 11 | Thyroidectomy | PTC |
| 68 | Patient124 | Negative | - | Female | 66 | No | No | II | 4a | Left | Single | Irregular | Hypoecho | Unclear | 10 | - | - |
| 69 | Patient125 | Negative | - | Female | 52 | No | No | II | 4a | Left | Multiple | Irregular | Hypoecho | Clear | 13.6 | - | - |
| 70 | Patient126 | Positive | 0.50% | Female | 64 | No | No | II | 4a | Right | Multiple | Irregular | Hypoecho | Unclear | 4.4 | thyroidectomy | PTC |
| 71 | Patient127 | Negative | - | Female | 50 | No | No | II | 4a | Right | Multiple | Regular | Hypoecho | Clear | 6 | - | - |
| 72 | Patient128 | Negative | - | Male | 47 | No | No | II | 4a | Left | Multiple | Regular | Hypoecho | Clear | 22 | - | - |
| 73 | Patient129 | Negative | - | Male | 46 | No | No | II | 4a | Left | Multiple | Irregular | Hypoecho | Unclear | 6 | Thyroidectomy | PTC |
| 74 | Patient129 | Negative | - | Male | 46 | No | No | II | 4a | Right | Multiple | Irregular | Hypoecho | Unclear | 6 | Thyroidectomy | PTC |
| 75 | Patient131 | Negative | - | Female | 53 | No | No | II | 4a | Left | Multiple | Irregular | Hypoecho | Unclear | 6 | - | - |
| 76 | Patient132 | Negative | - | Male | 45 | Yes | Yes | II | 4a | Left | Single | Regular | Hypoecho | Clear | 7 | - | - |
| 77 | Patient135 | Positive | 4.93% | Female | 56 | No | No | II | 4b | Left | Single | Irregular | Hypoecho | Unclear | 12 | - | - |
| 78 | Patient136 | Positive | 2.44% | Female | 65 | No | No | II | 4a | Left | Multiple | Regular | Hypoecho | Clear | 21 | - | - |
| 79 | Patient137 | Negative | - | Female | 34 | No | No | II | 4a | Left | Single | Irregular | Hypoecho | Unclear | 7 | - | - |
| 80 | Patient139 | Negative | - | Female | 34 | No | No | II | 4a | Left | Multiple | Irregular | Hypoecho | Unclear | 6 | - | - |
| 81 | Patient144 | Negative | - | Male | 46 | No | Yes | II | 4a | Left | Single | Irregular | Hypoecho | Unclear | 7.1 | - | - |
| 82 | Patient145 | Negative | - | Female | 54 | No | No | II | 4a | Right | Multiple | Irregular | Hypoecho | Unclear | 16 | - | - |
| 83 | Patient146 | Negative | - | Female | 59 | No | No | II | 4a | Left | Single | Irregular | Hypoecho | Unclear | 14 | - | - |
| 84 | Patient147 | Negative | - | Male | 36 | No | No | II | 4a | Left | Single | Irregular | Hypoecho | Unclear | 7 | - | - |
| 85 | Patient150 | Negative | - | Female | 51 | No | No | II | 4a | Left | Single | Irregular | Hypoecho | Unclear | 8 | - | - |
| 86 | Patient154 | Positive | 1.14% | Female | 58 | No | No | II | 4a | Right | Multiple | Irregular | Hypoecho | Unclear | 7 | Thyroidectomy | PTC |
| 87 | Patient157 | Negative | - | Male | 63 | No | No | II | 4a | Left | Single | Irregular | Hypoecho | Unclear | 7 | - | - |
| 88 | Patient161 | Negative | - | Female | 43 | No | No | II | 4a | Left | Single | Irregular | Hypoecho | Unclear | 7 | - | - |
| 89 | Patient165 | Negative | - | Female | 51 | No | No | II | 4a | Right | Single | Irregular | Hypoecho | Unclear | 8 | - | - |
| 90 | Patient167 | Negative | - | Female | 64 | No | No | II | 4a | Left | Single | Irregular | Hypoecho | Unclear | 13 | - | - |
| 91 | Patient169 | Positive | 0.81% | Male | 28 | No | No | II | 4a | Left | Multiple | Irregular | Hypoecho | Unclear | 1.8 | - | - |
| 92 | Patient172 | Negative | - | Female | 67 | No | No | II | 4a | Right | Multiple | Irregular | Hypoecho | Unclear | 8 | - | - |
| 93 | Patient172 | Negative | - | Female | 67 | No | No | II | 4a | Left | Multiple | Irregular | Hypoecho | Unclear | 8 | - | - |
| 94 | Patient174 | Negative | - | Male | 57 | No | Yes | II | 4a | Left | Multiple | Irregular | Hypoecho | Unclear | 4.3 | - | - |
| 95 | Patient182 | Negative | - | Male | 46 | No | Yes | II | 4a | Right | Single | Irregular | Hypoecho | Clear | 8 | - | - |
| 96 | Patient184 | Negative | - | Male | 56 | No | Yes | II | 4b | Left | Single | Regular | Hypoecho | Clear | 10 | - | - |
| 97 | Patient186 | Positive | 4.84% | Female | 62 | No | No | II | 4a | Right | Multiple | Irregular | Hypoecho | Unclear | 6.3 | - | - |
| 98 | Patient188 | Negative | - | Male | 48 | Yes | No | II | 4a | Right | Multiple | Regular | Hypoecho | Clear | 13 | - | - |
| 99 | Patient192 | Negative | - | Male | 48 | No | Yes | II | 4a | Left | Multiple | Irregular | Hypoecho | Unclear | 9 | - | - |
| 100 | Patient193 | Negative | - | Female | 50 | No | No | II | 4b | Left | Multiple | Irregular | Hypoecho | Unclear | 5 | - | - |
| 101 | Patient197 | Negative | - | Female | 41 | No | No | II | 4a | Right | Multiple | Regular | Hypoecho | Unclear | 21 | - | - |
| 102 | Patient198 | Positive | 10.90% | Male | 44 | Yes | Yes | II | 4a | Right | Single | Irregular | Hypoecho | Unclear | 8 | - | - |
| 103 | Patient203 | Negative | - | Female | 49 | No | No | II | 4a | Right | Multiple | Irregular | Hypoecho | Unclear | 5 | - | - |

Abbreviations: TBSRTC, the Bethesda System for Reporting Thyroid Cytopathology; C-TIRADS, Chinese thyroid imaging reporting and data system; PTC, papillary thyroid cancer.

**Supplementary Figure 1**


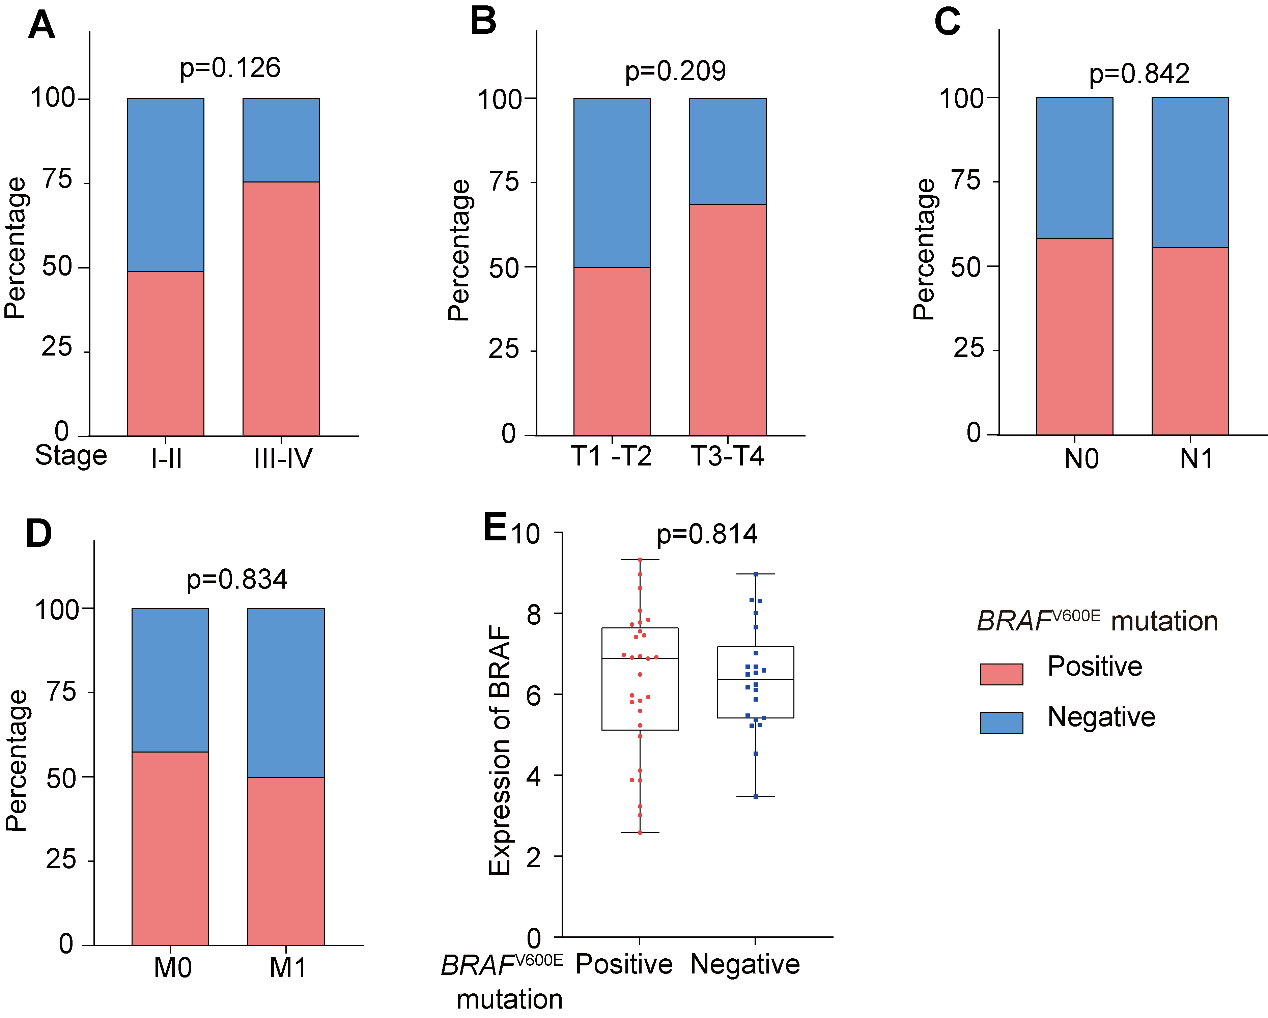


**Supplementary Figure 1:** Associations of *BRAF*V600E mutation with clinicopathological stages in Asian patients. (A-D) The difference of *BRAF*V600E mutation in (A) pathological stages, (B) in T stages, (C) in N stages, (D) in M stages in TCGA-THCA-Asian. (E) The correlation between *BRAF*V600E mutation and expression of BRAF in TCGA-THCA-Asian. Red: positive *BRAF*V600E mutation, blue: negative *BRAF*V600E mutation.

**Supplementary Figure 2**


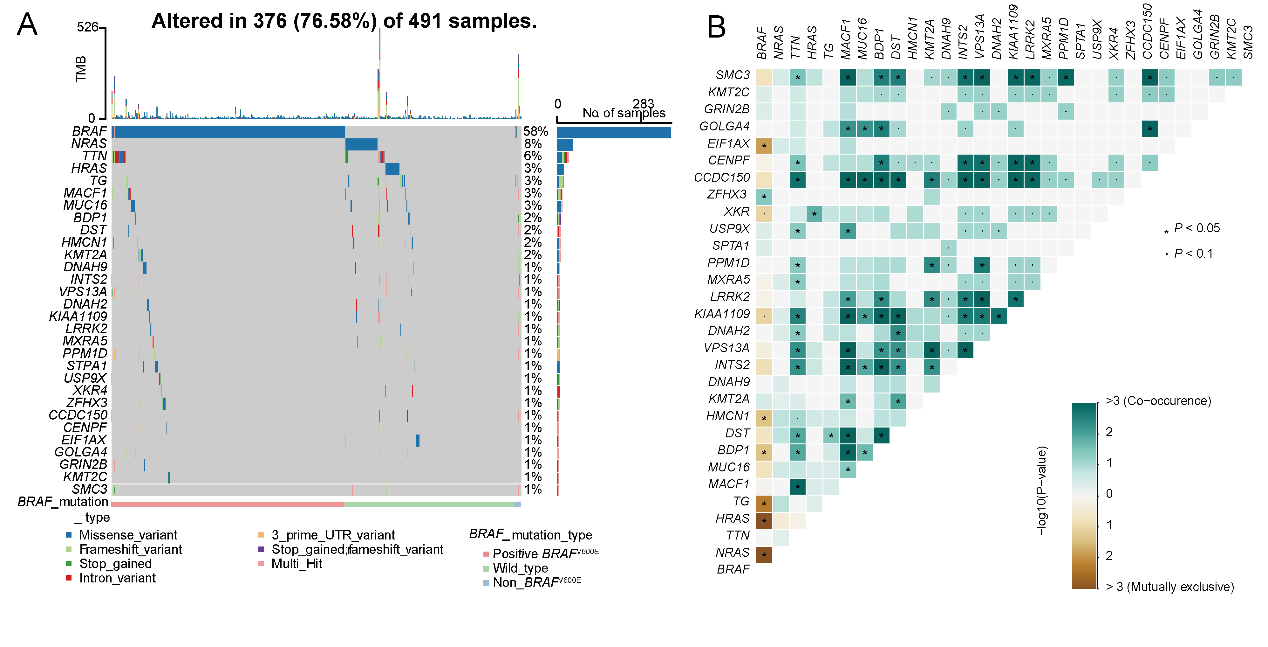


**Supplementary Figure 2:** The mutation genes features of patients in TCGA-THCA. (A) The oncoplot for the top 30 mutated genes of TCGA-THCA cohort. (B) The co-occurrence event analysis on the top 30 mutated genes of TCGA-THCA cohort.

**Supplementary Figure 3**


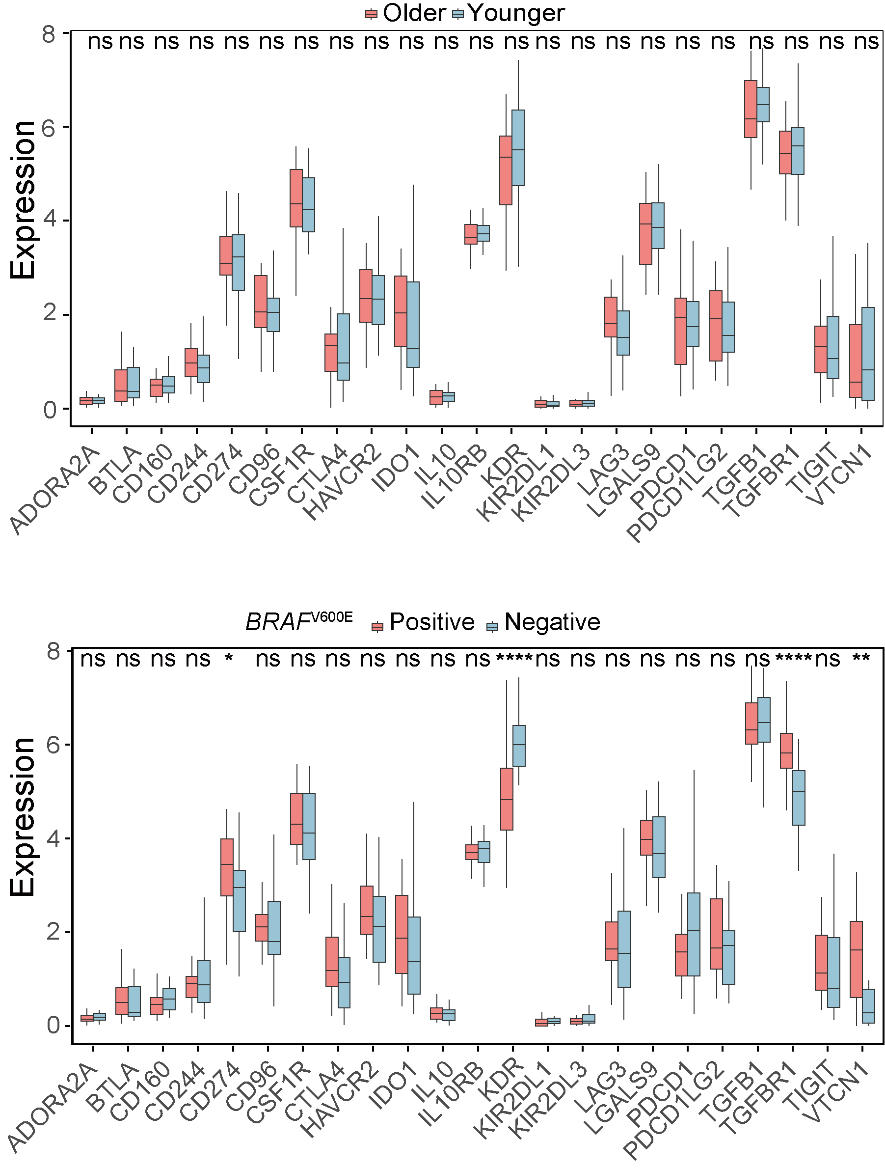


**Supplementary Figure 3:** The association in immunohibitors with *BRAF*V600E and patients age. The association in immunohibitors with positive and negative *BRAF*V600E mutation, older and younger patients in TCGA-THCA-Asian, younger: ≤50 years vs. older : >50 years patients age. ∗p < 0.05, ∗∗p < 0.01, and ∗∗∗p < 0.001.
